# Supplementary material for: The complete chloroplast genomes of seventeen Aegilops tauschii: genome comparative analysis and phylogenetic inference
Source: PubMed Central journal article supplement (PMC7060751; doi:10.7717/peerj.8678), 2020-03-04

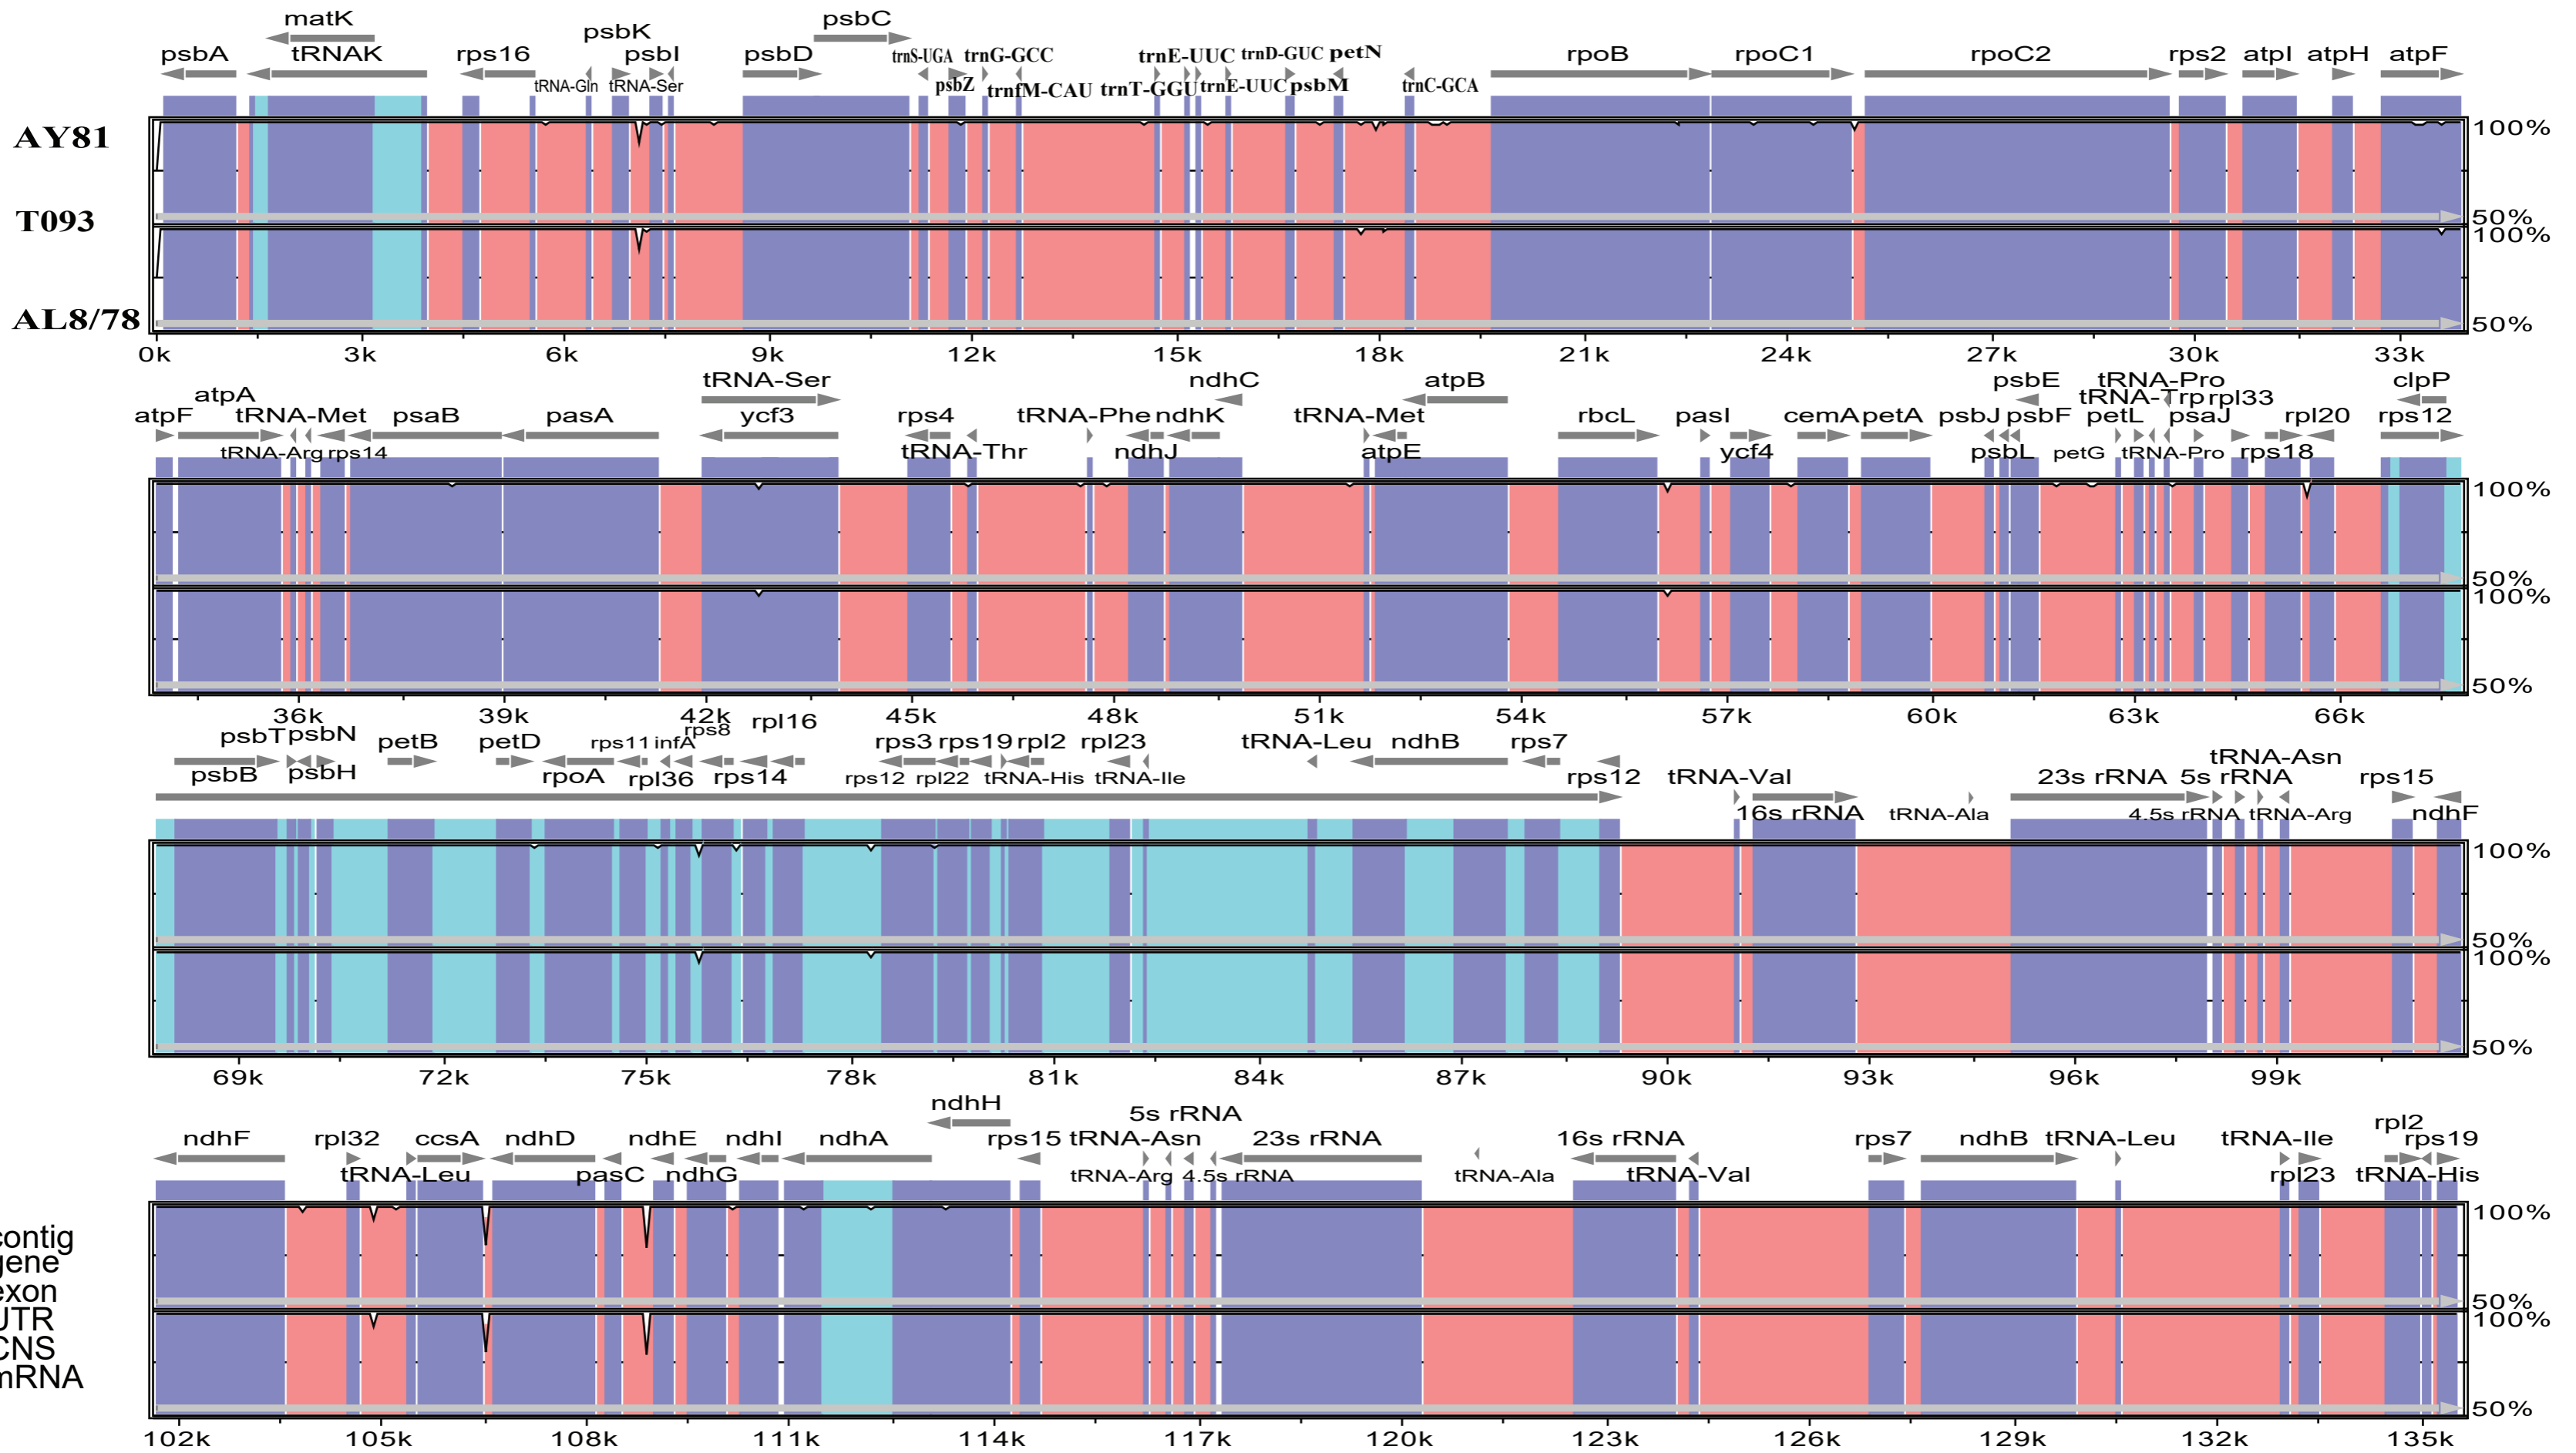

Supplement: peerj-08-8678-s007.pdf [file peerj-08-8678-s007.pdf]
